# Supplementary material for: Health Potential of Clery Strawberries: Enzymatic Inhibition and Anti-Candida Activity Evaluation
Source: MDPI journal article supplement (doi:10.3390/molecules26061731), 2021-03-19
Supplement: s1 [file s1]

## Health potential of Clery strawberries: enzymatic inhibition and anti-*Candida* activity evaluation

Francesco Cairone<sup>a,†</sup>, Giovanna Simonetti<sup>b,†</sup>, Anastasia Orekhova<sup>c</sup>, Maria Antonietta Casadei<sup>a</sup>,

Gokhan Zengin<sup>d</sup>, Stefania Cesa<sup>a</sup>

<sup>a</sup>*Dipartimento di Chimica e Tecnologie del Farmaco, Università degli Studi di Roma "La Sapienza",*

*Piazzale Aldo Moro 5, 00185 Roma, Italy*

<sup>b</sup>*Dipartimento di Biologia Ambientale, Università degli Studi di Roma "La Sapienza" P.le Aldo Moro 5, 00185 Rome, Italy*

<sup>c</sup>*Dipartimento di Sanità Pubblica e Malattie infettive, Università degli Studi di Roma "La Sapienza"*

*P.le Aldo Moro 5, 00185 Rome, Italy*

<sup>d</sup>*Department of Biology, Science Faculty, Selcuk University, 42130 Konya, Turkey*

<sup>†</sup> The authors contributed equally

\*Corresponding author: Stefania Cesa

*Address:* Department of Drug Chemistry and Technology, Università degli Studi di Roma "LaSapienza",

*Piazzale Aldo Moro 5, 00185 Rome, Italy*

*Tel.:* + 39 0649913198; *fax:* + 39 0649913133

*E-mail address:* [stefania.cesa@uniroma1.it](mailto:stefania.cesa@uniroma1.it)

**Table S1.** Colorimetric CIEL\*a\*b\* parameters of Clery graft on *Fragaria vesca* strawberry homogenates.

Reported results represent the mean value  $\pm$  SD from four experiments.

| Sample           | L*             | a*             | b*             | C* <sub>ab</sub> | h <sub>ab</sub> |
|------------------|----------------|----------------|----------------|------------------|-----------------|
| <b>M graft</b>   | 36.0 $\pm$ 0.3 | 18.5 $\pm$ 1.2 | 8.8 $\pm$ 0.7  | 20.5 $\pm$ 1.4   | 25.5 $\pm$ 0.2  |
| <b>U graft</b>   | 36.5 $\pm$ 0.3 | 17.9 $\pm$ 0.3 | 8.1 $\pm$ 0.2  | 19.6 $\pm$ 0.3   | 24.4 $\pm$ 0.3  |
| <b>MP graft</b>  | 37.6 $\pm$ 0.4 | 18.5 $\pm$ 0.8 | 8.3 $\pm$ 0.3  | 20.3 $\pm$ 0.9   | 24.0 $\pm$ 0.4  |
| <b>UP graft</b>  | 37.6 $\pm$ 0.6 | 17.6 $\pm$ 0.6 | 7.3 $\pm$ 0.5  | 19.1 $\pm$ 0.7   | 22.6 $\pm$ 0.9  |
| <b>BM graft</b>  | 44.0 $\pm$ 0.2 | 22.4 $\pm$ 0.6 | 9.9 $\pm$ 0.9  | 24.5 $\pm$ 0.9   | 23.8 $\pm$ 1.7  |
| <b>BU graft</b>  | 43.0 $\pm$ 0.7 | 21.9 $\pm$ 0.4 | 11.0 $\pm$ 0.3 | 24.5 $\pm$ 0.5   | 26.5 $\pm$ 0.3  |
| <b>BMP graft</b> | 41.5 $\pm$ 0.3 | 18.2 $\pm$ 1.2 | 7.5 $\pm$ 0.8  | 19.6 $\pm$ 1.4   | 22.3 $\pm$ 0.9  |
| <b>BUP graft</b> | 41.1 $\pm$ 0.9 | 18.0 $\pm$ 0.4 | 8.0 $\pm$ 0.2  | 19.7 $\pm$ 0.4   | 24.1 $\pm$ 0.1  |
| <b>WM graft</b>  | 35.9 $\pm$ 0.3 | 18.8 $\pm$ 0.4 | 8.7 $\pm$ 0.8  | 20.8 $\pm$ 0.8   | 24.7 $\pm$ 1.6  |
| <b>WU graft</b>  | 38.5 $\pm$ 0.2 | 21.5 $\pm$ 1.2 | 9.5 $\pm$ 1.9  | 23.6 $\pm$ 1.9   | 24.0 $\pm$ 3.2  |
| <b>PM graft</b>  | 37.2 $\pm$ 2.2 | 20.0 $\pm$ 0.1 | 9.4 $\pm$ 0.3  | 22.1 $\pm$ 0.2   | 25.0 $\pm$ 0.7  |
| <b>PU graft</b>  | 39.2 $\pm$ 3.1 | 21.7 $\pm$ 0.8 | 9.5 $\pm$ 0.6  | 23.7 $\pm$ 0.9   | 23.5 $\pm$ 0.8  |

**Table S2.** HPLC-DAD quantitative analysis of Clery graft samples.

|                                          | M<br>graft | U<br>graft | MP<br>graft | UP<br>graft | BM<br>graft | BU<br>graft | BMP<br>graft | BUP<br>graft | WM<br>graft | WU<br>graft | PM<br>graft | PU<br>graft |
|------------------------------------------|------------|------------|-------------|-------------|-------------|-------------|--------------|--------------|-------------|-------------|-------------|-------------|
| <b>Catechin</b>                          | 59.7       | 113.2      | 50.3        | 58.3        | 125.7       | 223.7       | 64.1         | 52.8         | 68.1        | 63.4        | 76.4        | 174.9       |
| <b>Epicatechin</b>                       | 277.9      | 300.8      | 402.2       | 268.6       | 365.2       | 374.4       | 257.8        | 197.4        | 154.2       | 285.3       | 197.7       | 217.5       |
| <b><i>p</i>-Coumaric<br/>acid</b>        | 12.9       | 13.2       | 13.6        | 13.6        | nd          | nd          | 4.5          | 8.9          | 7.2         | 18.7        | 8.6         | 5.7         |
| <b>Ferulic acid and<br/>derivatives*</b> | 209.3      | 242.5      | 222.2       | 166.9       | 145.7       | 219.8       | 109.1        | 82.7         | 85.5        | 97.9        | 167.4       | 170.3       |
| <b>Flavonols**</b>                       | 8.6        | 4.2        | 5.4         | 3.9         | 3.1         | 7.6         | 2.1          | 2.9          | 2.4         | 9.3         | 4.8         | 18.1        |
| <b>Anthocyanins***</b>                   | 91.8       | 78.4       | 70.9        | 65.9        | 128.1       | 99.1        | 41.8         | 63.1         | 37.5        | 77.8        | 183.6       | 190.1       |

Results are expressed in µg/g of fresh weight. The RSD value, evaluated on triplicates, was < 5%. \*Expressed as ferulic acid. \*\* Expressed as quercetin-3-D-galactoside. \*\*\* Expressed as pelargonidin-3-glucoside. nd = not detected
